# Supplementary material
Source: MDPI journal article supplement (https://www.mdpi.com/2076-3263/12/7/257)
Supplement: s1 [file s1]

Table S1

**Samples August 2010**

| ANALYTE   |  |  | Al2O3  | CaO    | Cr2O3  | Fe2O3  | K2O    | MgO    | MnO    | Na2O   | P2O5   | SiO2   | TiO2   |
|-----------|--|--|--------|--------|--------|--------|--------|--------|--------|--------|--------|--------|--------|
| METHOD    |  |  | ICP95A |
| DETECTION |  |  | 0.01   | 0.01   | 0.01   | 0.01   | 0.01   | 0.01   | 0.01   | 0.1    | 0.01   | 0.01   | 0.01   |
| UNITS     |  |  | %      | %      | %      | %      | %      | %      | %      | %      | %      | %      | %      |
| TRYAY-1   |  |  | 11     | 0.12   | 0.02   | 1.77   | 1.55   | 0.59   | 0.04   | 3.9    | 0.04   | 78.2   | 0.21   |
| TRYAY-2   |  |  | 10.3   | 0.09   | 0.03   | 1.91   | 1.92   | 0.68   | 0.04   | 2.7    | 0.03   | 78.9   | 0.22   |
| TRYAY-3   |  |  | 11.5   | 0.38   | 0.02   | 1.71   | 1.09   | 0.81   | 0.03   | 2.9    | 0.03   | 76.7   | 0.24   |
| TRYAY-4   |  |  | 17.7   | 1.23   | 0.03   | 6.05   | 2.38   | 3.38   | 0.11   | 4.6    | 0.02   | 58.8   | 0.62   |
| TRYAY-5   |  |  | 12.7   | 0.32   | 0.02   | 3.07   | 1.71   | 1.79   | 0.05   | 2.7    | 0.02   | 72.7   | 0.38   |
| TRYAY-6   |  |  | 14.2   | 5.63   | 0.01   | 5.28   | 2.53   | 6.08   | 0.11   | 0.2    | 0.04   | 59.4   | 0.73   |
| TRYAY-7   |  |  | 18.8   | 5.71   | 0.005  | 6.74   | 1.32   | 3.06   | 0.13   | 4.2    | 0.01   | 55.2   | 0.59   |
| TRYAY-8   |  |  | 17.3   | 9.09   | 0.005  | 11     | 0.51   | 5.3    | 0.18   | 3      | 0.08   | 47.9   | 1.18   |
| TRYAY-9   |  |  | 16.4   | 5.59   | 0.01   | 10.4   | 2.04   | 8.63   | 0.22   | 1.1    | 0.11   | 49.6   | 0.98   |
| TRYAY-10  |  |  | 13.3   | 1.43   | 0.03   | 2.2    | 3.23   | 0.63   | 0.05   | 2.5    | 0.02   | 71.4   | 0.53   |
| TRYAY-11  |  |  | 12.3   | 7.91   | 0.03   | 5.47   | 3.2    | 1.39   | 0.11   | 1.2    | 0.02   | 64.5   | 0.47   |
| TRYAY-12  |  |  | 12.2   | 0.17   | 0.03   | 2.59   | 1.46   | 1.28   | 0.06   | 3.7    | 0.02   | 72.9   | 0.25   |
| TRYAY-13  |  |  | 10.6   | 0.11   | 0.04   | 2.35   | 1.73   | 1.19   | 0.05   | 3      | 0.02   | 76.2   | 0.23   |
| TRYAY-14  |  |  | 16.7   | 0.43   | 0.005  | 8.08   | 0.69   | 4.63   | 0.12   | 5.6    | 0.03   | 56.9   | 0.98   |
| TRYAY-15  |  |  | 10.6   | 0.18   | 0.02   | 0.9    | 0.28   | 0.91   | 0.005  | 5      | 0.02   | 76.5   | 0.05   |

**Samples August 2013**

| ANALYTE   | B     | Mass  | Al2O3   | CaO     |  | Fe2O3(T) | K2O     | MgO     | MnO     | Na2O    | P2O5    | SiO2    | TiO2    |
|-----------|-------|-------|---------|---------|--|----------|---------|---------|---------|---------|---------|---------|---------|
| METHOD    | PGNAA | PGNAA | FUS-ICP | FUS-ICP |  | FUS-ICP  | FUS-ICP | FUS-ICP | FUS-ICP | FUS-ICP | FUS-ICP | FUS-ICP | FUS-ICP |
| DETECTION | 2     |       | 0.01    | 0.01    |  | 0.01     | 0.01    | 0.01    | 0.001   | 0.01    | 0.01    | 0.01    | 0.001   |
| UNITS     | ppm   | g     | %       | %       |  | %        | %       | %       | %       | %       | %       | %       | %       |
| TRYAY-16  | 11    | 1.04  | 11.56   | 0.14    |  | 3.3      | 0.86    | 1.2     | 0.043   | 4.5     | 0.01    | 75.23   | 0.23    |
| TRYAY-17  | 17    | 1.02  | 10.8    | 0.16    |  | 1.98     | 1.57    | 1.85    | 0.046   | 2.13    | 0.02    | 77.61   | 0.215   |
| TRYAY-18  | 30    | 1.03  | 12.56   | 0.09    |  | 2.27     | 2.6     | 0.9     | 0.018   | 2.87    | 0.03    | 77.12   | 0.376   |
| TRYAY-19  | 19    | 1.08  | 11.16   | 0.39    |  | 2.5      | 1.72    | 1.03    | 0.068   | 3.27    | 0.02    | 77.22   | 0.23    |
| TRYAY-20  | 10    | 1.08  | 12.34   | 0.23    |  | 2.61     | 2.65    | 2.36    | 0.064   | 2.67    | 0.005   | 73.86   | 0.24    |
| TRYAY-21  | 4     | 1.02  | 10.65   | 0.1     |  | 2.01     | 1.09    | 1.67    | 0.031   | 3.03    | 0.005   | 78.79   | 0.23    |
| TRYAY-22  | 28    | 1.04  | 12.01   | 0.1     |  | 2.27     | 1.75    | 1.24    | 0.076   | 2.94    | 0.005   | 76.03   | 0.269   |
| TRYAY-23  | 15    | 1.06  | 12.09   | 0.47    |  | 2.72     | 2.44    | 1.58    | 0.093   | 3.08    | 0.005   | 74.41   | 0.291   |
| TRYAY-24  | 15    | 1.01  | 12.36   | 0.09    |  | 1.99     | 2.21    | 0.76    | 0.018   | 3.68    | 0.02    | 75.88   | 0.245   |
| TRYAY-25  | 18    | 1.01  | 11.18   | 0.6     |  | 2.48     | 0.5     | 1.92    | 0.067   | 3.05    | 0.01    | 76.78   | 0.251   |
| TRYAY-26  | 18    | 1.04  | 11.53   | 0.14    |  | 2.34     | 1.36    | 1.32    | 0.063   | 2.95    | 0.01    | 76.77   | 0.25    |
| TRYAY-27  | 20    | 1.03  | 10.67   | 0.07    |  | 2.38     | 2.01    | 0.82    | 0.016   | 2.09    | 0.04    | 79.33   | 0.253   |
| TRYAY-28  | 16    | 1.03  | 10.7    | 0.1     |  | 1.95     | 1.37    | 1.69    | 0.049   | 2.92    | 0.02    | 78.03   | 0.208   |
| TRYAY-29  | 11    | 1.04  | 11.65   | 0.13    |  | 2.66     | 1.11    | 1.49    | 0.047   | 3.28    | 0.03    | 77.31   | 0.272   |
| TRYAY-30  | 7     | 1.06  | 15.12   | 9.39    |  | 9.73     | 0.37    | 6.05    | 0.216   | 2.41    | 0.1     | 53.12   | 1.018   |
| TRYAY-31  | 12    | 1.02  | 11.65   | 0.51    |  | 2.2      | 2.46    | 1.22    | 0.054   | 1.85    | 0.04    | 76.2    | 0.259   |
| TRYAY-32  | 17    | 1.02  | 12.74   | 0.22    |  | 2.41     | 1.2     | 1.17    | 0.06    | 4.39    | 0.005   | 76.07   | 0.235   |

Table S1

**Samples August 2010**

| ANALYTE   | Ba     |  | Nb     |  | Sr     | Y      |  | Zn     | Zr     | Sum    | LOI    | Al     | Ba     | Be     |
|-----------|--------|--|--------|--|--------|--------|--|--------|--------|--------|--------|--------|--------|--------|
| METHOD    | ICP95A |  | ICP95A |  | ICP95A | ICP95A |  | ICP95A | ICP95A | ICP95A | ICP95A | ICM90A | ICM90A | ICM90A |
| DETECTION | 10     |  | 10     |  | 10     | 10     |  | 5      | 10     | 0.01   | 0.01   | 0.01   | 0.5    | 5      |
| UNITS     | ppm    |  | ppm    |  | ppm    | ppm    |  | ppm    | ppm    | %      | %      | %      | ppm    | ppm    |
| TRYAY-1   | 250    |  | 5      |  | 140    | 10     |  | 38     | 100    | 98.8   | 1.42   | 5.88   | 239    | 2.5    |
| TRYAY-2   | 210    |  | 5      |  | 80     | 10     |  | 44     | 100    | 98.4   | 1.65   | 5.48   | 207    | 2.5    |
| TRYAY-3   | 310    |  | 10     |  | 140    | 10     |  | 32     | 120    | 97.3   | 1.89   | 6.26   | 310    | 2.5    |
| TRYAY-4   | 400    |  | 20     |  | 220    | 20     |  | 117    | 170    | 97.9   | 2.94   | 9.68   | 382    | 2.5    |
| TRYAY-5   | 330    |  | 10     |  | 120    | 10     |  | 63     | 120    | 97.8   | 2.32   | 6.89   | 323    | 2.5    |
| TRYAY-6   | 960    |  | 20     |  | 310    | 10     |  | 177    | 120    | 97.5   | 3.33   | 7.8    | 933    | 2.5    |
| TRYAY-7   | 240    |  | 20     |  | 530    | 20     |  | 87     | 30     | 97.3   | 1.58   | 10.2   | 228    | 2.5    |
| TRYAY-8   | 180    |  | 20     |  | 450    | 20     |  | 100    | 70     | 97.7   | 2.11   | 9.69   | 163    | 2.5    |
| TRYAY-9   | 300    |  | 20     |  | 300    | 20     |  | 191    | 70     | 98.4   | 3.29   | 8.88   | 288    | 2.5    |
| TRYAY-10  | 1190   |  | 20     |  | 250    | 30     |  | 34     | 280    | 96.5   | 1.24   | 7.16   | 1160   | 2.5    |
| TRYAY-11  | 1360   |  | 5      |  | 420    | 20     |  | 60     | 90     | 97.4   | 0.69   | 6.75   | 1310   | 2.5    |
| TRYAY-12  | 130    |  | 5      |  | 60     | 20     |  | 110    | 110    | 96.6   | 1.91   | 6.65   | 117    | 2.5    |
| TRYAY-13  | 260    |  | 10     |  | 130    | 10     |  | 81     | 90     | 97.1   | 1.64   | 5.7    | 250    | 2.5    |
| TRYAY-14  | 120    |  | 5      |  | 250    | 20     |  | 128    | 60     | 97.5   | 3.29   | 9.01   | 111    | 2.5    |
| TRYAY-15  | 50     |  | 40     |  | 60     | 10     |  | 17     | 50     | 95.4   | 0.94   | 5.89   | 38.5   | 2.5    |

**Samples August 2013**

| ANALYTE   | Ba      | Be      |  | Sc      | Sr      | Y       | V       |  | Zr      | Total   | LOI     |  |  |  |
|-----------|---------|---------|--|---------|---------|---------|---------|--|---------|---------|---------|--|--|--|
| METHOD    | FUS-ICP | FUS-ICP |  | FUS-ICP | FUS-ICP | FUS-ICP | FUS-ICP |  | FUS-ICP | FUS-ICP | FUS-ICP |  |  |  |
| DETECTION | 3       | 1       |  | 1       | 2       | 2       | 5       |  | 4       | 0.01    |         |  |  |  |
| UNITS     | ppm     | ppm     |  | ppm     | ppm     | ppm     | ppm     |  | ppm     | %       | %       |  |  |  |
| TRYAY-16  | 173     | 0.5     |  | 8       | 89      | 13      | 54      |  | 55      | 98.49   | 1.42    |  |  |  |
| TRYAY-17  | 266     | 0.5     |  | 5       | 82      | 18      | 10      |  | 86      | 98.78   | 2.41    |  |  |  |
| TRYAY-18  | 268     | 0.5     |  | 8       | 132     | 23      | 37      |  | 107     | 100.7   | 1.9     |  |  |  |
| TRYAY-19  | 313     | 0.5     |  | 5       | 107     | 15      | 19      |  | 85      | 99.21   | 1.6     |  |  |  |
| TRYAY-20  | 574     | 0.5     |  | 6       | 130     | 23      | 25      |  | 107     | 99.17   | 2.14    |  |  |  |
| TRYAY-21  | 180     | 0.5     |  | 5       | 95      | 23      | 14      |  | 85      | 99.5    | 1.91    |  |  |  |
| TRYAY-22  | 332     | 0.5     |  | 5       | 82      | 18      | 16      |  | 83      | 98.71   | 2.03    |  |  |  |
| TRYAY-23  | 1274    | 1       |  | 7       | 146     | 26      | 29      |  | 90      | 99.03   | 1.84    |  |  |  |
| TRYAY-24  | 168     | 0.5     |  | 5       | 102     | 22      | 20      |  | 100     | 98.93   | 1.68    |  |  |  |
| TRYAY-25  | 105     | 0.5     |  | 6       | 138     | 16      | 21      |  | 82      | 99.08   | 2.24    |  |  |  |
| TRYAY-26  | 286     | 1       |  | 6       | 143     | 17      | 21      |  | 90      | 98.84   | 2.1     |  |  |  |
| TRYAY-27  | 277     | 1       |  | 6       | 97      | 20      | 28      |  | 94      | 99.73   | 2.05    |  |  |  |
| TRYAY-28  | 233     | 0.5     |  | 5       | 92      | 23      | 14      |  | 87      | 99.02   | 1.98    |  |  |  |
| TRYAY-29  | 190     | 0.5     |  | 6       | 148     | 22      | 24      |  | 88      | 99.94   | 1.95    |  |  |  |
| TRYAY-30  | 177     | 1       |  | 34      | 402     | 23      | 304     |  | 62      | 99.29   | 1.77    |  |  |  |
| TRYAY-31  | 332     | 1       |  | 6       | 132     | 23      | 23      |  | 114     | 98.86   | 2.42    |  |  |  |
| TRYAY-32  | 234     | 1       |  | 6       | 82      | 19      | 19      |  | 95      | 100.2   | 1.65    |  |  |  |

Elemental analysis of sample aliquots

Table S1

**Samples August 2010**

| ANALYTE   | Ca     | Cr     | Cu     | Fe     | K      | Li     | Mg     | Mn     | Ni     | P      | Sc     | Sr     | Ti     | V      |
|-----------|--------|--------|--------|--------|--------|--------|--------|--------|--------|--------|--------|--------|--------|--------|
| METHOD    | ICM90A |
| DETECTION | 0.1    | 10     | 5      | 0.01   | 0.1    | 10     | 0.01   | 10     | 5      | 0.01   | 5      | 0.1    | 0.01   | 5      |
| UNITS     | %      | ppm    | ppm    | %      | %      | ppm    | %      | ppm    | ppm    | %      | ppm    | ppm    | %      | ppm    |
| TRYAY-1   | 0.2    | 130    | 2.5    | 1.22   | 1.3    | 5      | 0.36   | 310    | 11     | 0.02   | 2.5    | 151    | 0.14   | 14     |
| TRYAY-2   | 0.1    | 190    | 2.5    | 1.3    | 1.7    | 5      | 0.4    | 310    | 11     | 0.005  | 5      | 93.9   | 0.14   | 16     |
| TRYAY-3   | 0.3    | 150    | 2.5    | 1.15   | 1      | 5      | 0.5    | 210    | 9      | 0.005  | 2.5    | 154    | 0.16   | 13     |
| TRYAY-4   | 0.9    | 200    | 12     | 4.13   | 2.1    | 10     | 2.12   | 900    | 16     | 0.005  | 13     | 232    | 0.4    | 131    |
| TRYAY-5   | 0.3    | 180    | 10     | 2.1    | 1.5    | 5      | 1.11   | 410    | 15     | 0.005  | 8      | 134    | 0.24   | 50     |
| TRYAY-6   | 4      | 70     | 2.5    | 3.62   | 2.3    | 10     | 3.7    | 860    | 10     | 0.02   | 11     | 328    | 0.46   | 165    |
| TRYAY-7   | 4      | 70     | 9      | 4.67   | 1.2    | 10     | 1.9    | 990    | 10     | 0.005  | 13     | 559    | 0.38   | 173    |
| TRYAY-8   | 6.6    | 40     | 36     | 7.71   | 0.6    | 10     | 3.31   | 1410   | 14     | 0.04   | 30     | 465    | 0.76   | 301    |
| TRYAY-9   | 4      | 90     | 69     | 7.3    | 1.8    | 30     | 5.13   | 1660   | 22     | 0.05   | 28     | 320    | 0.63   | 280    |
| TRYAY-10  | 1.1    | 200    | 6      | 1.5    | 2.8    | 10     | 0.38   | 380    | 9      | 0.005  | 9      | 260    | 0.34   | 29     |
| TRYAY-11  | 5.6    | 180    | 33     | 3.79   | 2.9    | 5      | 0.85   | 880    | 14     | 0.005  | 14     | 439    | 0.3    | 111    |
| TRYAY-12  | 0.2    | 200    | 19     | 1.78   | 1.3    | 5      | 0.79   | 470    | 12     | 0.005  | 6      | 74.5   | 0.16   | 23     |
| TRYAY-13  | 0.2    | 220    | 6      | 1.59   | 1.5    | 5      | 0.74   | 380    | 11     | 0.01   | 2.5    | 144    | 0.15   | 17     |
| TRYAY-14  | 0.4    | 40     | 2.5    | 5.64   | 0.6    | 20     | 2.89   | 960    | 6      | 0.02   | 21     | 266    | 0.62   | 80     |
| TRYAY-15  | 0.2    | 160    | 8      | 0.63   | 0.3    | 5      | 0.55   | 80     | 9      | 0.005  | 2.5    | 76.1   | 0.03   | 5      |

**Samples August 2013**

| ANALYTE   | Cr     | Cu     |  |  |  |  |  | Ni     |  |  |  |  |  |  |
|-----------|--------|--------|--|--|--|--|--|--------|--|--|--|--|--|--|
| METHOD    | FUS-MS | FUS-MS |  |  |  |  |  | FUS-MS |  |  |  |  |  |  |
| DETECTION | 20     | 10     |  |  |  |  |  | 20     |  |  |  |  |  |  |
| UNITS     | ppm    | ppm    |  |  |  |  |  | ppm    |  |  |  |  |  |  |
| TRYAY-16  | 100    | 5      |  |  |  |  |  | 10     |  |  |  |  |  |  |
| TRYAY-17  | 20     | 5      |  |  |  |  |  | 10     |  |  |  |  |  |  |
| TRYAY-18  | 80     | 10     |  |  |  |  |  | 10     |  |  |  |  |  |  |
| TRYAY-19  | 30     | 5      |  |  |  |  |  | 10     |  |  |  |  |  |  |
| TRYAY-20  | 60     | 5      |  |  |  |  |  | 10     |  |  |  |  |  |  |
| TRYAY-21  | 10     | 5      |  |  |  |  |  | 10     |  |  |  |  |  |  |
| TRYAY-22  | 60     | 5      |  |  |  |  |  | 10     |  |  |  |  |  |  |
| TRYAY-23  | 20     | 5      |  |  |  |  |  | 10     |  |  |  |  |  |  |
| TRYAY-24  | 60     | 5      |  |  |  |  |  | 10     |  |  |  |  |  |  |
| TRYAY-25  | 30     | 5      |  |  |  |  |  | 10     |  |  |  |  |  |  |
| TRYAY-26  | 70     | 5      |  |  |  |  |  | 10     |  |  |  |  |  |  |
| TRYAY-27  | 20     | 5      |  |  |  |  |  | 10     |  |  |  |  |  |  |
| TRYAY-28  | 50     | 5      |  |  |  |  |  | 10     |  |  |  |  |  |  |
| TRYAY-29  | 30     | 5      |  |  |  |  |  | 10     |  |  |  |  |  |  |
| TRYAY-30  | 60     | 20     |  |  |  |  |  | 10     |  |  |  |  |  |  |
| TRYAY-31  | 10     | 5      |  |  |  |  |  | 10     |  |  |  |  |  |  |
| TRYAY-32  | 50     | 5      |  |  |  |  |  | 10     |  |  |  |  |  |  |

Table S1

**Samples August 2010**

| ANALYTE   | Zn     | Ag     | As     | Bi     | Cd     | Ce     | Co     | Cs     | Dy     | Er     | Eu     | Ga     | Gd     | Ge     |
|-----------|--------|--------|--------|--------|--------|--------|--------|--------|--------|--------|--------|--------|--------|--------|
| METHOD    | ICM90A |
| DETECTION | 5      | 1      | 5      | 0.1    | 0.2    | 0.1    | 0.5    | 0.1    | 0.05   | 0.05   | 0.05   | 1      | 0.05   | 1      |
| UNITS     | ppm    |
| TRYAY-1   | 27     | 0.5    | 2.5    | 0.05   | 0.1    | 22.6   | 2.1    | 1.3    | 1.96   | 1.31   | 0.44   | 9      | 1.51   | 2      |
| TRYAY-2   | 36     | 0.5    | 2.5    | 0.05   | 0.1    | 25.7   | 2.3    | 0.8    | 2.34   | 1.51   | 0.46   | 10     | 1.77   | 2      |
| TRYAY-3   | 19     | 0.5    | 2.5    | 0.05   | 0.1    | 16.3   | 2.3    | 1.4    | 2.26   | 1.9    | 0.4    | 12     | 1.44   | 2      |
| TRYAY-4   | 97     | 0.5    | 2.5    | 0.1    | 0.1    | 37.6   | 15.8   | 2.1    | 3.07   | 1.95   | 0.89   | 19     | 3.04   | 1      |
| TRYAY-5   | 86     | 0.5    | 2.5    | 0.1    | 0.1    | 25.7   | 5.1    | 2.3    | 2.09   | 1.56   | 0.42   | 14     | 1.73   | 1      |
| TRYAY-6   | 146    | 0.5    | 7      | 0.3    | 0.1    | 46.3   | 8.8    | 1.4    | 2.51   | 1.59   | 0.93   | 21     | 2.78   | 1      |
| TRYAY-7   | 70     | 0.5    | 2.5    | 0.05   | 0.1    | 30.4   | 13.2   | 3.3    | 3.2    | 2      | 1.04   | 21     | 3.02   | 1      |
| TRYAY-8   | 76     | 0.5    | 7      | 0.05   | 0.1    | 22.5   | 34.1   | 5.1    | 4.08   | 2.6    | 1.24   | 21     | 3.52   | 1      |
| TRYAY-9   | 166    | 0.5    | 5      | 0.05   | 0.1    | 29.9   | 30.3   | 5.9    | 3.55   | 2.13   | 1.22   | 18     | 3.89   | 2      |
| TRYAY-10  | 20     | 0.5    | 2.5    | 0.05   | 0.1    | 68.3   | 3.3    | 5.1    | 6.02   | 3.86   | 1.12   | 16     | 5.58   | 2      |
| TRYAY-11  | 45     | 0.5    | 18     | 0.1    | 0.1    | 30.6   | 6.2    | 0.6    | 3.24   | 1.94   | 0.88   | 15     | 2.83   | 1      |
| TRYAY-12  | 93     | 0.5    | 2.5    | 0.05   | 0.1    | 29     | 3.8    | 1.4    | 3.25   | 2.01   | 0.61   | 13     | 2.55   | 1      |
| TRYAY-13  | 65     | 0.5    | 2.5    | 0.1    | 0.1    | 24.6   | 3      | 0.4    | 1.9    | 1.22   | 0.45   | 11     | 1.45   | 1      |
| TRYAY-14  | 107    | 0.5    | 2.5    | 0.05   | 4.9    | 15.6   | 13.9   | 0.4    | 3.63   | 2.52   | 0.83   | 20     | 2.57   | 1      |
| TRYAY-15  | 6      | 0.5    | 2.5    | 0.05   | 0.1    | 31.1   | 2.6    | 0.1    | 2.14   | 1.25   | 0.1    | 10     | 1.96   | 1      |

**Samples August 2013**

| ANALYTE   | Zn     | Ag     | As     | Bi     | Ce     | Co     | Cs     | Dy     | Er     | Eu     | Ga     | Gd     | Ge     |
|-----------|--------|--------|--------|--------|--------|--------|--------|--------|--------|--------|--------|--------|--------|
| METHOD    | FUS-MS |
| DETECTION | 30     | 0.5    | 5      | 0.4    | 0.1    | 1      | 0.5    | 0.1    | 0.1    | 0.05   | 1      | 0.1    | 1      |
| UNITS     | ppm    |
| TRYAY-16  | 40     | 0.25   | 2.5    | 0.2    | 24.8   | 7      | 0.6    | 1.8    | 1.3    | 0.47   | 10     | 1.6    | 0.5    |
| TRYAY-17  | 15     | 0.25   | 2.5    | 0.2    | 21.6   | 1      | 0.7    | 2.2    | 1.4    | 0.39   | 8      | 1.7    | 0.5    |
| TRYAY-18  | 40     | 0.25   | 2.5    | 0.2    | 29.5   | 3      | 0.9    | 2.3    | 1.5    | 0.51   | 11     | 2      | 1      |
| TRYAY-19  | 50     | 0.25   | 2.5    | 0.2    | 13.3   | 3      | 1      | 1.7    | 1.3    | 0.31   | 10     | 1.2    | 1      |
| TRYAY-20  | 50     | 0.25   | 2.5    | 0.2    | 35.6   | 3      | 0.25   | 2.9    | 2      | 0.65   | 11     | 2.5    | 0.5    |
| TRYAY-21  | 40     | 0.25   | 2.5    | 0.2    | 27.9   | 2      | 1.2    | 3.1    | 2.3    | 0.62   | 9      | 2.3    | 0.5    |
| TRYAY-22  | 90     | 0.25   | 2.5    | 0.2    | 24.3   | 2      | 2.5    | 2.2    | 1.6    | 0.48   | 10     | 1.9    | 0.5    |
| TRYAY-23  | 40     | 0.25   | 2.5    | 0.2    | 28.6   | 3      | 0.25   | 2.3    | 1.7    | 0.58   | 10     | 2.3    | 0.5    |
| TRYAY-24  | 40     | 0.25   | 2.5    | 0.2    | 31.3   | 2      | 0.9    | 2.8    | 1.8    | 0.62   | 12     | 2.5    | 0.5    |
| TRYAY-25  | 30     | 0.25   | 2.5    | 0.2    | 26     | 2      | 1      | 2.1    | 1.4    | 0.52   | 10     | 1.9    | 0.5    |
| TRYAY-26  | 70     | 0.25   | 2.5    | 0.2    | 28.7   | 3      | 0.8    | 2.4    | 1.7    | 0.53   | 11     | 1.9    | 0.5    |
| TRYAY-27  | 70     | 0.25   | 2.5    | 0.2    | 29.4   | 3      | 0.25   | 2.3    | 1.6    | 0.47   | 10     | 1.9    | 2      |
| TRYAY-28  | 40     | 0.25   | 2.5    | 0.2    | 25.1   | 2      | 0.6    | 2.7    | 1.8    | 0.52   | 11     | 2.6    | 0.5    |
| TRYAY-29  | 50     | 0.25   | 2.5    | 0.2    | 20.8   | 3      | 0.25   | 2.1    | 1.5    | 0.42   | 11     | 1.5    | 0.5    |
| TRYAY-30  | 80     | 0.25   | 11     | 0.2    | 19.9   | 31     | 0.7    | 3.8    | 2.2    | 1.08   | 16     | 3.7    | 2      |
| TRYAY-31  | 50     | 0.25   | 2.5    | 0.2    | 35.1   | 2      | 4.7    | 2.8    | 1.9    | 0.65   | 12     | 2.5    | 1      |
| TRYAY-32  | 60     | 0.25   | 2.5    | 0.2    | 24.7   | 3      | 1      | 2.4    | 1.6    | 0.48   | 11     | 2      | 0.5    |

Elemental analysis of sample aliquots

Table S1

**Samples August 2010**

| ANALYTE   | Hf     | Ho     | In     | La     | Lu     | Mo     | Nb     | Nd     | Pb     | Pr     | Rb     | Sb     | Sm     | Sn     |
|-----------|--------|--------|--------|--------|--------|--------|--------|--------|--------|--------|--------|--------|--------|--------|
| METHOD    | ICM90A |
| DETECTION | 1      | 0.05   | 0.2    | 0.1    | 0.05   | 2      | 1      | 0.1    | 5      | 0.05   | 0.2    | 0.1    | 0.1    | 1      |
| UNITS     | ppm    |
| TRYAY-1   | 3      | 0.47   | 0.1    | 12.2   | 0.32   | 3      | 6      | 9.2    | 7      | 2.41   | 22.2   | 0.8    | 1.7    | 1      |
| TRYAY-2   | 3      | 0.49   | 0.1    | 14     | 0.32   | 4      | 6      | 10     | 6      | 2.72   | 25.1   | 0.6    | 1.8    | 0.5    |
| TRYAY-3   | 3      | 0.55   | 0.1    | 8.9    | 0.38   | 4      | 6      | 6.7    | 7      | 1.8    | 25.1   | 1.2    | 1.5    | 1      |
| TRYAY-4   | 4      | 0.67   | 0.1    | 18.6   | 0.31   | 6      | 9      | 17.7   | 8      | 4.49   | 47.9   | 0.7    | 3.4    | 1      |
| TRYAY-5   | 3      | 0.46   | 0.1    | 14.1   | 0.38   | 4      | 8      | 10.2   | 6      | 2.85   | 33.9   | 1.5    | 1.9    | 1      |
| TRYAY-6   | 4      | 0.53   | 0.1    | 23.5   | 0.26   | 1      | 12     | 20.6   | 14     | 5.46   | 61.5   | 1.1    | 3.6    | 1      |
| TRYAY-7   | 1      | 0.68   | 0.1    | 15     | 0.36   | 1      | 5      | 15.9   | 8      | 3.8    | 29.4   | 2      | 3.3    | 1      |
| TRYAY-8   | 2      | 0.84   | 0.1    | 9.9    | 0.46   | 3      | 4      | 13.9   | 9      | 3.08   | 10.6   | 3.1    | 3.7    | 2      |
| TRYAY-9   | 2      | 0.75   | 0.1    | 13.7   | 0.35   | 1      | 5      | 17.3   | 10     | 3.98   | 61.2   | 1.7    | 3.8    | 1      |
| TRYAY-10  | 8      | 1.3    | 0.1    | 35.7   | 0.76   | 5      | 14     | 28.9   | 13     | 7.8    | 104    | 1      | 5.8    | 2      |
| TRYAY-11  | 2      | 0.66   | 0.1    | 16.4   | 0.37   | 4      | 6      | 13.3   | 17     | 3.52   | 56     | 2      | 3      | 2      |
| TRYAY-12  | 3      | 0.66   | 0.1    | 15.6   | 0.39   | 6      | 6      | 11.6   | 10     | 3.25   | 23.1   | 0.6    | 2.4    | 1      |
| TRYAY-13  | 3      | 0.41   | 0.1    | 13.4   | 0.27   | 6      | 6      | 9.8    | 7      | 2.67   | 24.2   | 0.7    | 1.7    | 0.5    |
| TRYAY-14  | 2      | 0.82   | 0.1    | 7.7    | 0.41   | 1      | 3      | 8.9    | 9      | 2.05   | 8      | 0.8    | 2.1    | 0.5    |
| TRYAY-15  | 2      | 0.45   | 0.1    | 17.5   | 0.22   | 4      | 36     | 10.5   | 2.5    | 3.18   | 11     | 0.3    | 2.1    | 2      |

**Samples August 2013**

| ANALYTE   | Hf     | Ho     | In     | La     | Lu     | Mo     | Nb     | Nd     | Pb     | Pr     | Rb     | Sb     | Sm     | Sn     |
|-----------|--------|--------|--------|--------|--------|--------|--------|--------|--------|--------|--------|--------|--------|--------|
| METHOD    | FUS-MS |
| DETECTION | 0.2    | 0.1    | 0.2    | 0.1    | 0.04   | 2      | 1      | 0.1    | 5      | 0.05   | 2      | 0.5    | 0.1    | 1      |
| UNITS     | ppm    |
| TRYAY-16  | 1.5    | 0.4    | 0.1    | 13     | 0.24   | 1      | 0.5    | 9.6    | 2.5    | 2.52   | 11     | 0.6    | 1.6    | 0.5    |
| TRYAY-17  | 2.2    | 0.5    | 0.1    | 11.1   | 0.27   | 1      | 0.5    | 8.7    | 2.5    | 2.18   | 14     | 0.25   | 1.7    | 0.5    |
| TRYAY-18  | 2.1    | 0.5    | 0.1    | 15.6   | 0.31   | 1      | 2      | 11.9   | 6      | 3.07   | 32     | 0.25   | 2.2    | 0.5    |
| TRYAY-19  | 2.6    | 0.4    | 0.1    | 7      | 0.3    | 2      | 1      | 5.1    | 5      | 1.34   | 20     | 0.25   | 0.9    | 0.5    |
| TRYAY-20  | 2.8    | 0.6    | 0.1    | 19     | 0.36   | 1      | 2      | 13.5   | 10     | 3.73   | 31     | 0.25   | 2.7    | 0.5    |
| TRYAY-21  | 2.2    | 0.7    | 0.1    | 15.1   | 0.43   | 1      | 0.5    | 10.9   | 6      | 2.91   | 24     | 0.25   | 2.2    | 0.5    |
| TRYAY-22  | 2.1    | 0.5    | 0.1    | 13.1   | 0.3    | 1      | 1      | 9.4    | 2.5    | 2.55   | 21     | 0.6    | 1.8    | 0.5    |
| TRYAY-23  | 2.4    | 0.5    | 0.1    | 14.7   | 0.32   | 1      | 1      | 11.2   | 5      | 3.03   | 27     | 0.25   | 2.3    | 0.5    |
| TRYAY-24  | 2.8    | 0.6    | 0.1    | 16.6   | 0.35   | 1      | 2      | 12.6   | 2.5    | 3.27   | 27     | 0.25   | 2.4    | 0.5    |
| TRYAY-25  | 2.2    | 0.4    | 0.1    | 13.9   | 0.29   | 1      | 1      | 10.8   | 2.5    | 2.69   | 7      | 0.25   | 2      | 0.5    |
| TRYAY-26  | 2.5    | 0.5    | 0.1    | 15.3   | 0.34   | 1      | 2      | 11.2   | 2.5    | 3      | 14     | 0.8    | 2.2    | 0.5    |
| TRYAY-27  | 2.6    | 0.5    | 0.1    | 15.7   | 0.31   | 1      | 1      | 11.4   | 6      | 3.12   | 28     | 0.25   | 2.1    | 0.5    |
| TRYAY-28  | 2.6    | 0.6    | 0.1    | 12.9   | 0.34   | 1      | 2      | 10.3   | 2.5    | 2.73   | 16     | 0.25   | 2.1    | 0.5    |
| TRYAY-29  | 2      | 0.5    | 0.1    | 11.2   | 0.28   | 1      | 0.5    | 8.5    | 2.5    | 2.23   | 13     | 0.25   | 1.6    | 0.5    |
| TRYAY-30  | 2      | 0.8    | 0.1    | 8.3    | 0.35   | 1      | 0.5    | 12.6   | 6      | 2.65   | 3      | 0.25   | 3.5    | 0.5    |
| TRYAY-31  | 2.5    | 0.6    | 0.1    | 18.9   | 0.34   | 1      | 1      | 13.4   | 2.5    | 3.65   | 43     | 0.25   | 2.6    | 0.5    |
| TRYAY-32  | 2.5    | 0.5    | 0.1    | 12.9   | 0.3    | 1      | 4      | 9.3    | 6      | 2.57   | 16     | 0.25   | 2      | 0.5    |

Elemental analysis of sample aliquots

Table S1

**Samples August 2010**

| ANALYTE   | Ta     | Tb     | Th     | Tl     | Tm     | U      | W      | Y      | Yb     | Zr     |
|-----------|--------|--------|--------|--------|--------|--------|--------|--------|--------|--------|
| METHOD    | ICM90A |
| DETECTION | 0.5    | 0.05   | 0.1    | 0.5    | 0.05   | 0.05   | 1      | 0.5    | 0.1    | 0.5    |
| UNITS     | ppm    |
| TRYAY-1   | 0.25   | 0.28   | 4.1    | 0.25   | 0.26   | 0.97   | 1      | 12.6   | 1.7    | 96.9   |
| TRYAY-2   | 0.25   | 0.35   | 4      | 0.25   | 0.22   | 0.96   | 0.5    | 13.8   | 1.9    | 93.7   |
| TRYAY-3   | 0.25   | 0.26   | 4.8    | 0.25   | 0.3    | 1.31   | 2      | 15.7   | 2.3    | 113    |
| TRYAY-4   | 0.25   | 0.47   | 6.7    | 0.25   | 0.28   | 1.54   | 2      | 17     | 1.8    | 151    |
| TRYAY-5   | 0.25   | 0.31   | 4.9    | 0.25   | 0.27   | 1.39   | 2      | 13.6   | 1.9    | 118    |
| TRYAY-6   | 0.25   | 0.4    | 7.8    | 0.25   | 0.24   | 1.42   | 2      | 13.7   | 1.5    | 134    |
| TRYAY-7   | 0.25   | 0.52   | 2.5    | 0.25   | 0.3    | 1.19   | 1      | 17.6   | 1.9    | 23     |
| TRYAY-8   | 0.25   | 0.62   | 1.3    | 0.25   | 0.34   | 0.3    | 2      | 21.9   | 2.5    | 62.7   |
| TRYAY-9   | 0.25   | 0.62   | 1.9    | 0.6    | 0.32   | 0.41   | 0.5    | 19.4   | 2      | 67.5   |
| TRYAY-10  | 0.25   | 0.93   | 11.1   | 0.6    | 0.62   | 3.22   | 1      | 36     | 4.5    | 267    |
| TRYAY-11  | 0.25   | 0.46   | 4.3    | 0.25   | 0.31   | 1.42   | 2      | 18.4   | 2      | 82.4   |
| TRYAY-12  | 0.25   | 0.5    | 4.5    | 0.25   | 0.32   | 1.26   | 1      | 20     | 2.2    | 103    |
| TRYAY-13  | 0.25   | 0.26   | 3.8    | 0.25   | 0.2    | 0.96   | 2      | 11.1   | 1.5    | 85.7   |
| TRYAY-14  | 0.25   | 0.52   | 0.6    | 0.25   | 0.39   | 0.36   | 1      | 22.2   | 2.6    | 56.7   |
| TRYAY-15  | 2.8    | 0.32   | 22     | 0.25   | 0.21   | 4.14   | 0.5    | 11.3   | 1.4    | 49.5   |

**Samples August 2013**

| ANALYTE   | Ta     | Tb     | Th     | Tl     | Tm     | U      | W      |  | Yb     |
|-----------|--------|--------|--------|--------|--------|--------|--------|--|--------|
| METHOD    | FUS-MS |  | FUS-MS |
| DETECTION | 0.1    | 0.1    | 0.1    | 0.1    | 0.05   | 0.1    | 1      |  | 0.1    |
| UNITS     | ppm    |  | ppm    |
| TRYAY-16  | 0.3    | 0.3    | 3.5    | 0.05   | 0.2    | 0.8    | 0.5    |  | 1.4    |
| TRYAY-17  | 0.4    | 0.3    | 3.8    | 0.05   | 0.22   | 1.1    | 0.5    |  | 1.6    |
| TRYAY-18  | 0.5    | 0.4    | 4.6    | 0.05   | 0.24   | 1.2    | 0.5    |  | 1.8    |
| TRYAY-19  | 0.4    | 0.2    | 3.8    | 0.05   | 0.23   | 1.1    | 0.5    |  | 1.7    |
| TRYAY-20  | 0.5    | 0.4    | 5      | 0.05   | 0.31   | 1.5    | 0.5    |  | 2.1    |
| TRYAY-21  | 0.5    | 0.4    | 4.4    | 0.05   | 0.37   | 1.5    | 0.5    |  | 2.6    |
| TRYAY-22  | 0.4    | 0.3    | 4      | 0.05   | 0.24   | 1.2    | 0.5    |  | 1.8    |
| TRYAY-23  | 0.5    | 0.4    | 4      | 0.05   | 0.25   | 1      | 0.5    |  | 1.8    |
| TRYAY-24  | 0.5    | 0.4    | 4.6    | 0.05   | 0.28   | 1.4    | 0.5    |  | 2      |
| TRYAY-25  | 0.5    | 0.3    | 4.1    | 0.05   | 0.23   | 1.1    | 0.5    |  | 1.8    |
| TRYAY-26  | 0.5    | 0.4    | 4.4    | 0.05   | 0.27   | 1.1    | 0.5    |  | 1.9    |
| TRYAY-27  | 0.5    | 0.3    | 4.2    | 0.05   | 0.26   | 1.1    | 0.5    |  | 1.8    |
| TRYAY-28  | 0.5    | 0.4    | 4.4    | 0.05   | 0.28   | 1.2    | 0.5    |  | 1.9    |
| TRYAY-29  | 0.4    | 0.3    | 3.9    | 0.05   | 0.22   | 1.1    | 0.5    |  | 1.6    |
| TRYAY-30  | 0.2    | 0.6    | 1      | 0.05   | 0.33   | 0.4    | 2      |  | 2.2    |
| TRYAY-31  | 0.5    | 0.4    | 4.5    | 0.05   | 0.29   | 1.4    | 0.5    |  | 2      |
| TRYAY-32  | 0.4    | 0.4    | 4.1    | 0.05   | 0.26   | 1.2    | 1      |  | 1.8    |
